# Supplementary material for: The neurochemistry and morphology of functionally identified corneal polymodal nociceptors and cold thermoreceptors
Source: PubMed Central journal article supplement (PMC5874071; doi:10.1371/journal.pone.0195108), 2018-03-28
Supplement: pone.0195108.s001.pdf [file pone.0195108.s001.pdf]

**S1 Table. Data for cold thermoreceptor nerve terminal impulses and observational findings for the nerve terminal located at each recording site.**

|             | Latency of electrically evoked NTIs | Amplitude of spontaneous NTIs <sup>#</sup> | Amplitude of electrically evoked NTIs <sup>#</sup> | NTI frequency at basal temperature <sup>†</sup> | NTI frequency at the peak of the response to heating <sup>†</sup> | NTI frequency at the peak of the response to cooling <sup>†</sup> | Immuno-labelling primary antibodies* | Nerve terminal labelling at recording site | TRPM8 nerve terminal morphology <sup>¶</sup> |
|-------------|-------------------------------------|--------------------------------------------|----------------------------------------------------|-------------------------------------------------|-------------------------------------------------------------------|-------------------------------------------------------------------|--------------------------------------|--------------------------------------------|----------------------------------------------|
|             | ms                                  | μV                                         | μV                                                 | Impulses/s                                      | Impulses/s                                                        | Impulses/s                                                        |                                      |                                            |                                              |
| <b>C1</b>   | 8.9                                 | 57                                         | 98                                                 | 10.8                                            | 0                                                                 | 14.8                                                              | TRPM8 & βTb                          | TRPM8 + βTb                                | Complex                                      |
| <b>C2</b>   | 4.6                                 | 82                                         | 99                                                 | 12                                              | 2.8                                                               | 18                                                                | TRPM8 & βTb                          | TRPM8 + βTb                                | Complex                                      |
| <b>C3</b>   | 10.4                                | 94                                         | 114                                                | 8.6                                             | 0.8                                                               | 11.8                                                              | TRPM8 & βTb                          | TRPM8 + βTb                                | Complex                                      |
| <b>C4</b>   | 8.0                                 | 42                                         | 57                                                 | 10                                              | 0                                                                 | 16                                                                | TRPM8 & βTb                          | TRPM8 + βTb                                | Complex                                      |
| <b>C5</b>   | 9.7                                 | 66                                         | 90                                                 | 5.2                                             | 0.2                                                               | 11.2                                                              | TRPM8 & βTb                          | TRPM8 + βTb                                | Complex                                      |
| <b>C6</b>   | 4.3                                 | 62                                         | 66                                                 | 11                                              | 0                                                                 | 19.6                                                              | TRPM8 & βTb                          | TRPM8 + βTb                                | Complex                                      |
| <b>C7</b>   | 6.6                                 | 54                                         | 59                                                 | 4.6                                             | 0                                                                 | 19.2                                                              | TRPV1 & βTb                          | βTb                                        | -                                            |
| <b>C8</b>   | 8.1                                 | 30                                         | 53                                                 | 10.4                                            | 2.4                                                               | 14.2                                                              | TRPV1 & βTb                          | βTb                                        | -                                            |
| <b>C9</b>   | 8.0                                 | 25                                         | 47                                                 | 7                                               | 0                                                                 | 11                                                                | TRPV1 & βTb                          | βTb                                        | -                                            |
| <b>C10</b>  | 7.8                                 | 26                                         | 47                                                 | 8.4                                             | 0.2                                                               | 16.8                                                              | TRPV1 & βTb                          | βTb                                        | -                                            |
| <b>C11</b>  | 7.1                                 | 37                                         | 51                                                 | 9.4                                             | 0.2                                                               | 14.6                                                              | TRPV1 & βTb                          | βTb                                        | -                                            |
| <b>C12</b>  | 12.2                                | 68                                         | 79                                                 | 14.4                                            | 0.4                                                               | 18                                                                | TRPV1 & βTb                          | βTb                                        | -                                            |
| <b>Mean</b> | 8.0                                 | 54                                         | 72                                                 | 9.3                                             | 0.6                                                               | 15.4                                                              |                                      |                                            |                                              |
| <b>SD</b>   | 2.2                                 | 22                                         | 23                                                 | 2.8                                             | 1.0                                                               | 3.0                                                               |                                      |                                            |                                              |

NTI: Nerve terminal impulse

# The peak-to-peak amplitude of the diphasic spontaneous and electrically evoked NTIs were measured from averages of 25 NTIs. Before averaging the NTIs were aligned by their positive peak.

† The number of NTI during 5 seconds at the basal temperature (~32°C) and at the peak of the response to heating (to ~38°C) and cooling (to ~28°C) were measured.

\* Primary antibodies: rabbit anti-TRPM8 (TRPM8), rabbit anti-TRPV1 (TRPV1), mouse anti-β-tubulin III (βTb). See Table 1 in paper for details of source and concentration.

¶ Complex nerve terminal morphology: the axon branch(es) from the subbasal plexus that gave rise to the TRPM8-immunoreactive axon terminals under the recording electrode had complex morphology with irregular large *en passant* boutons, short (< 5 μm) axonal side branches in the wing cell and squamous cell layers, and multiple bulbar endings located close to the surface of the corneal epithelium.
